# Supplementary material
Source: publisher figshare collection journal article supplement (https://acs.figshare.com/ndownloader/files/12375161)
Supplement: Supplementary file 1 [file 12375161]

## Supporting Information

### **Atomic Structures of Pt Nanoclusters Supported on Graphene Grown on Pt(111)**

**Pei-Yang Cai<sup>a</sup>, Yen-Wen Huang<sup>a</sup>, Yi-Cheng Huang<sup>a</sup>, Meng-Chin Cheng<sup>b</sup>,  
Liang-Wei Lan<sup>c</sup>, Chien-Cheng Kuo<sup>c</sup>, Jeng-Han Wang<sup>b,\*</sup> and Meng-Fan Luo<sup>a,\*\*</sup>**

*<sup>a</sup>Department of Physics, National Central University, 300 Zhongda Road, Taoyuan  
32001, Taiwan*

*<sup>b</sup>Department of Chemistry, National Taiwan Normal University, Taipei, Taiwan*

*<sup>c</sup>Department of Physics, National Sun Yat-sen University, 70 Lienhai Rd., Kaohsiung  
80424, Taiwan*

\*Corresponding authors E-mail: [mfl28@phy.ncu.edu.tw](mailto:mfl28@phy.ncu.edu.tw) (M.F. Luo) and  
[jenghan@ntnu.edu.tw](mailto:jenghan@ntnu.edu.tw) (J.H. Wang)

Figure S1 shows the LEED pattern from a graphene/Pt(111) surface. The graphene was grown on exposing Pt(111) to ethylene (300 L) at 950 K. The six sharp spots

come from Pt(111) substrate, corresponding to the six-fold symmetrical structure. The outer arc- shape spots and the faint spots in line with the Pt spots are from the graphene layer. The centers of the arc-shape spots are rotated by an angle of  $30^\circ$  relative to the spots from Pt(111). The result resembles earlier ones from the graphene/Pt(111) prepared under a similar condition.<sup>1,2</sup> This observation does not agree entirely with that by using RHHED. The RHHED patterns show the diffraction intensities from  $\mathbf{G}_0^\circ$  and  $\mathbf{G}_{30^\circ}$  are comparable, whereas the LEED patterns show that the intensity from  $\mathbf{G}_{30^\circ}$  is stronger than that from  $\mathbf{G}_0^\circ$ .

Figure S2(a) shows the DFT modelling for  $\mathbf{G}_0^\circ$ , the corrugated graphene sheet. The upper part of Figure S2 shows the side view through direction  $[1\bar{1}00]$  of the graphene and direction  $[\bar{1}10]$  of the Pt(111) surface, and the lower part the top view. The side view clearly indicates the carbon (C) atoms are not all at the same level: some are higher and some lower. The graphene sheet corrugated a little, due to its strong interaction with the Pt(111) surface. The strong interaction is also reflected in the graphene  $p$  band in the antibonding regime. Figure S2(b) compare the DOS of the  $p$  bands of C atoms from the grown graphene on Pt(111) and free-standing graphene. The  $p$  band of  $\mathbf{G}_{30^\circ}$  (flat and with no corrugation) resembles that of free-standing graphene, implying a weaker interaction between  $\mathbf{G}_{30^\circ}$  and Pt(111), whereas that of  $\mathbf{G}_0^\circ$  differs evidently in the antibonding regime (Energy  $\geq 0$ ). As the  $p$  band in the

antibonding regime involves the interaction with Pt(111), the evident difference indicates a strong  $\mathbf{G}_{0^\circ}$ -Pt(111) interaction.

Figure S3 shows the DOS analysis of the  $d$  bands of the Pt adlayers in  $\mathbf{Pt}_{0^\circ}/\mathbf{G}_{0^\circ}$  and  $\mathbf{Pt}_{0^\circ}/\mathbf{G}_{30^\circ}$ . The  $d$  band center of the Pt adlayer in  $\mathbf{Pt}_{0^\circ}/\mathbf{G}_{0^\circ}$  has a lower energy (-2.91 eV) whereas that in  $\mathbf{Pt}_{0^\circ}/\mathbf{G}_{30^\circ}$  has a higher one (-2.33 eV); the latter is closer to that for an isolated Pt layer (black line in Figure S3). Additionally, the DOS line of the  $d$  band for the Pt adlayer in  $\mathbf{Pt}_{0^\circ}/\mathbf{G}_{30^\circ}$  also resembles more that for an isolated Pt layer. Both these features suggest that the Pt adlayer-graphene interaction in  $\mathbf{Pt}_{0^\circ}/\mathbf{G}_{0^\circ}$  is stronger.

Figure S4(a) shows optimized structures and induced charges of Pt adlayers on the graphene/Pt(111) surfaces. The Pt adlayers were initially arranged to have a rotation of  $30^\circ$  with respect to the beneath Pt lattice,  $\mathbf{Pt}_{30^\circ}/\mathbf{G}_{0^\circ}$  (left) and  $\mathbf{Pt}_{30^\circ}/\mathbf{G}_{30^\circ}$  (right), but became disordered after the structural optimization. Nevertheless, the situation for a Pt adlayer on a free-standing graphene differs. The Pt layer is allowed to adsorb on the free-standing graphene sheet in an ordered structure either commensurate with ( $\mathbf{Pt}_{0^\circ}/\mathbf{G}$ ;  $0^\circ$  in  $\mathbf{Pt}_{0^\circ}$  indicates the angle relative to the graphene lattice) or rotated by  $30^\circ$  with respect to the graphene lattice ( $\mathbf{Pt}_{30^\circ}/\mathbf{G}$ ), as shown in Figure S4(b). The uniformly distributed charges of  $\mathbf{Pt}_{0^\circ}/\mathbf{G}$  and  $\mathbf{Pt}_{30^\circ}/\mathbf{G}$  from the top views (the lower part Figure S4(b)) also confirmed that the preferred  $0^\circ$  and  $30^\circ$

orientations between graphene and Pt layers are constrained by both their lattices as well as charges, the same as that from  $\mathbf{G}_{0^\circ}$  and  $\mathbf{G}_{30^\circ}$  (Figure 5(a)). The adsorption in either case is weak (-0.19 and -0.10 eV/unit). Such a Pt adlayer-graphene interaction ( $\mathbf{Pt}_{0^\circ}/\mathbf{G}$  or  $\mathbf{Pt}_{30^\circ}/\mathbf{G}$ ) exhibits the feature of a van der Waals interaction and resembles that of  $\mathbf{Pt}_{0^\circ}/\mathbf{G}_{30^\circ}$ .

Figure S5 shows the optimized structures (top and side views) of a series of 3D Pt clusters ( $\mathbf{Pt}_{37}$ ,  $\mathbf{Pt}_{22}$ ,  $\mathbf{Pt}_{10}$  and  $\mathbf{Pt}_4$ ) on the graphene/Pt(111) substrates,  $\mathbf{G}_{0^\circ}$  and  $\mathbf{G}_{30^\circ}$ . The 3D Pt clusters, graphene layers and top few layers of Pt(111) surface were fully relaxed during the optimization. The results, combining with the calculations with the largest cluster ( $\mathbf{Pt}_{55}$ ), shown in Figure 6(c), were employed to examine the growing Pt clusters on the graphene. The optimized structures show that the Pt clusters have similar shapes on both substrates — they have a fcc phase and grow in (111) orientation; on either  $\mathbf{G}_{0^\circ}$  or  $\mathbf{G}_{30^\circ}$ , their rotational angles relative to the underlying Pt(111) lattice are  $0^\circ$ , like the Pt adlayers (Figure 6(b)). On the other hand, the Pt clusters on  $\mathbf{G}_{0^\circ}$  have much stronger adsorption energy and induce further corrugation of the graphene surfaces, whereas the weakly adsorbed Pt clusters on  $\mathbf{G}_{30^\circ}$  have greater cluster-graphene distances and rather flat graphene surfaces.

## References

1. Gao, M.; Pan, Y.; Huang, L.; Hu, H.; Zhang, L. Z.; Guo, H. M.; Du, S. X.; Gao, H.-J., Epitaxial growth and structural property of graphene on Pt(111). *Applied Physics Letters* **2011**, 98 (3), 033101.
2. Preobrajenski, A. B.; Ng, M. L.; Vinogradov, A. S.; Mårtensson, N., Controlling graphene corrugation on lattice-mismatched substrates. *Physical Review B* **2008**, 78 (7), 073401.

**Figure S1**

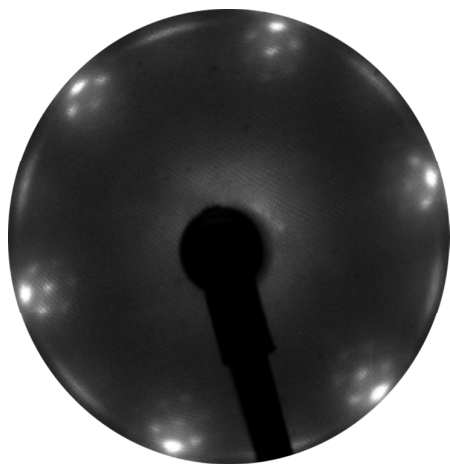

**Figure S1** a LEED pattern for a graphene/Pt(111) surface. The graphene was grown on exposing Pt(111) to ethylene (300 L) at 950 K and then annealing the sample at the same temperature for 10 min.

**Figure S2**

(a)

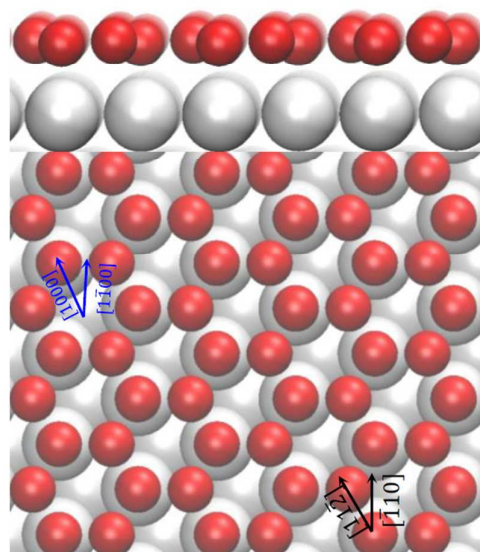

(b)

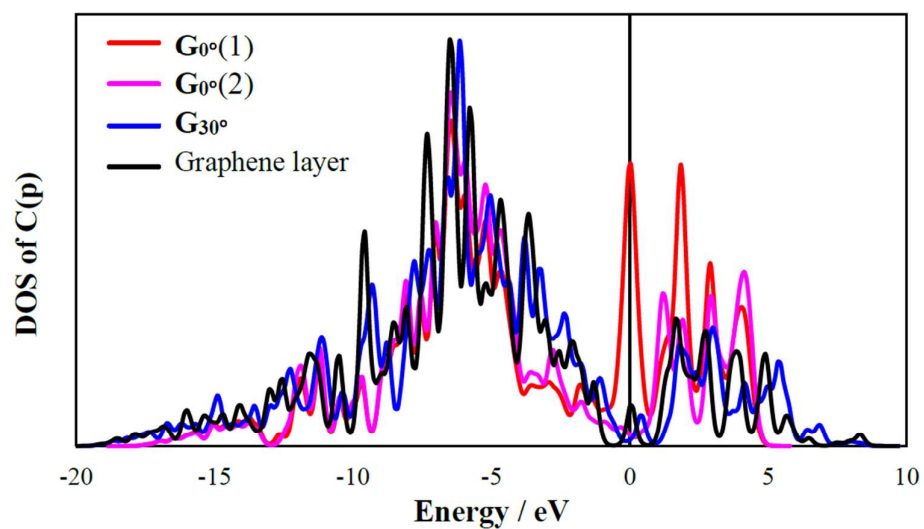

**Figure S2.** (a) Corrugated graphene sheet of  $G_{0^\circ}$  in the zoom-in top and side views through direction  $[1\bar{1}00]$  of the graphene and direction  $[\bar{1}10]$  of the Pt(111) surface; (b) DOS analysis for the  $p$  bands of carbon (C) atoms of the grown graphene

on Pt(111). In (a), the red and grey balls denote C and Pt atoms, respectively; the rotations of adsorbed graphene and the Pt(111) surface are noted with blue and black arrows and numbers, respectively. Two types of C are found in  $\mathbf{G}_{0^\circ}$ , red ( $\mathbf{G}_{0^\circ}(1)$ ) and purple ( $\mathbf{G}_{0^\circ}(2)$ ) lines, and one type of C was found in  $\mathbf{G}_{30^\circ}$ , blue line, referenced to that of the isolated graphene layer (black line).



**Figure S3**

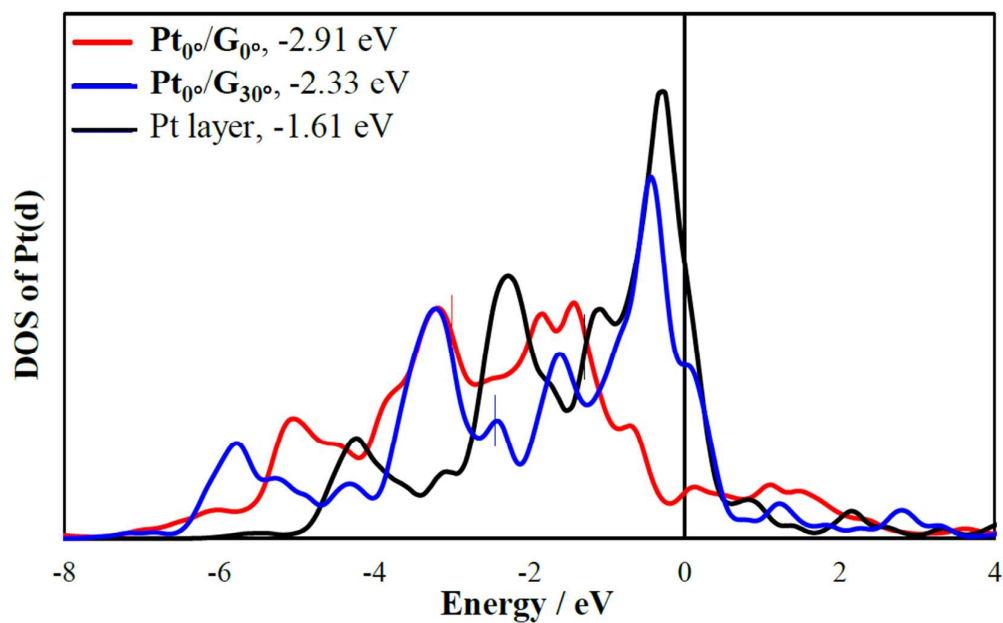

**Figure S3.** DOS analysis of the  $d$  bands of the adsorbed Pt layer in  $\text{Pt}_{0^\circ}/\text{G}_{0^\circ}$  and  $\text{Pt}_{0^\circ}/\text{G}_{30^\circ}$  is shown in red and blue lines, respectively, referred to that of an isolated Pt layer (black line). Their  $d$ -band centers are marked with short vertical lines and indicated with numbers in the legend.

**Figure S4**

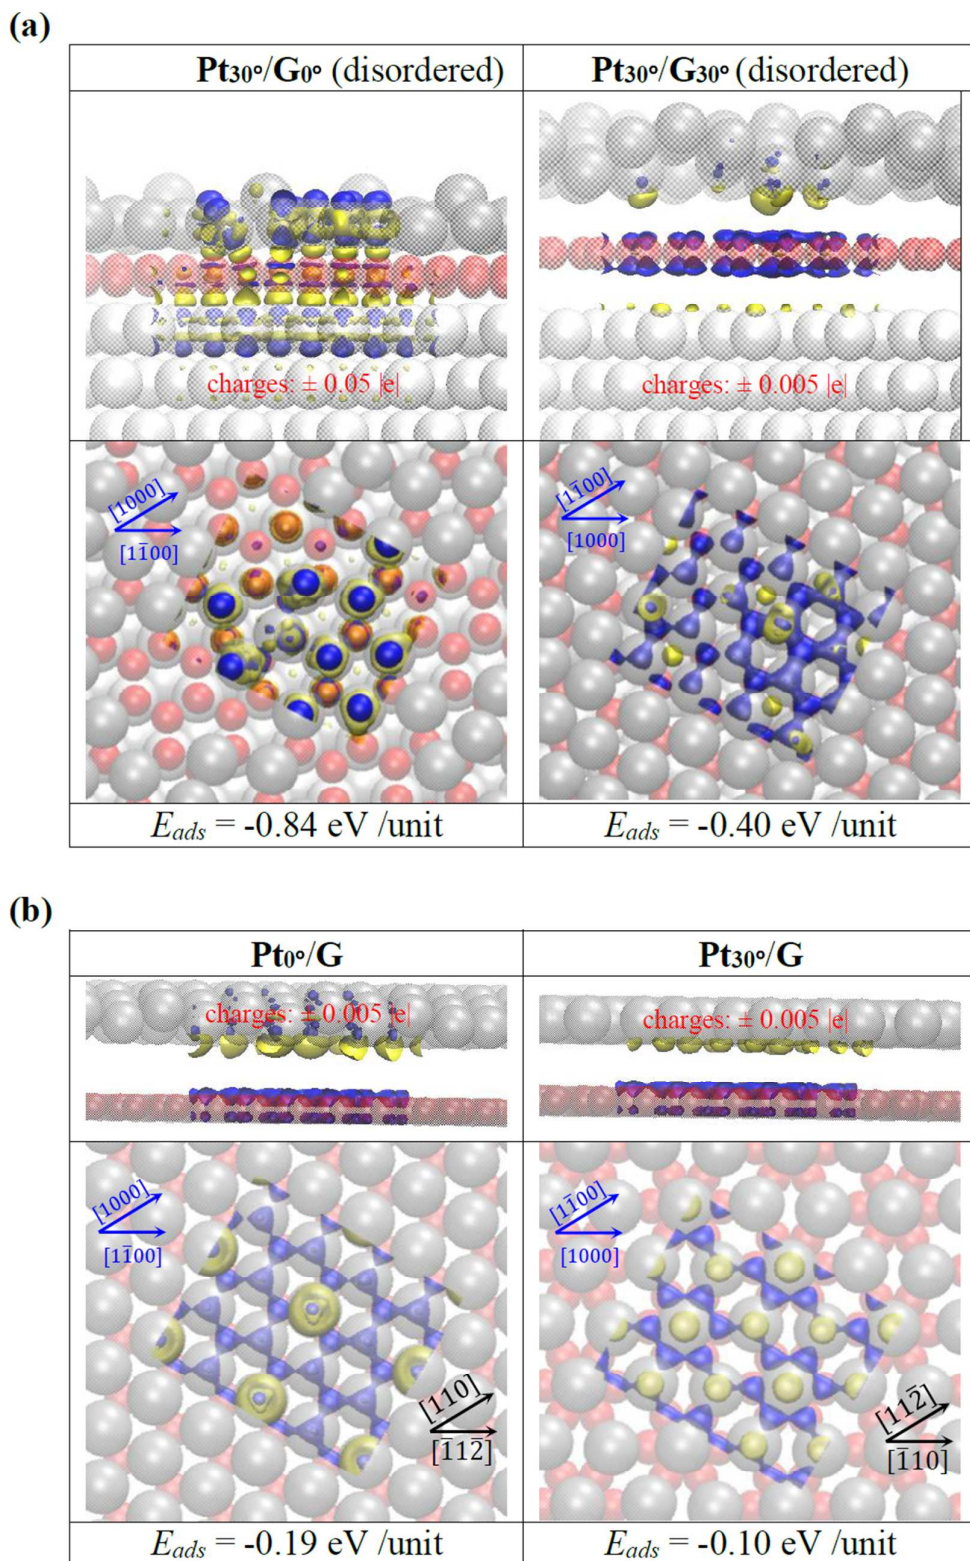

**Figure S4.** (a) Optimized structures and induced charges of Pt adlayers on the graphene/Pt(111) surfaces. The Pt adlayers were initially set to have a rotation of  $30^\circ$

with respect to the beneath Pt lattice,  $\text{Pt}_{30^\circ}/\text{G}_{0^\circ}$  (left) and  $\text{Pt}_{30^\circ}/\text{G}_{30^\circ}$  (right), but became disordered after the structural optimization. The orientations of the graphene are noted with blue arrows and numbers. (b) Optimized structures and induced charges of a Pt layer on an isolated graphene sheet. The Pt layer is orderly and uniformly adsorbed in both commensurate and  $30^\circ$ -rotated configurations,  $\text{Pt}_{0^\circ}/\text{G}$  and  $\text{Pt}_{30^\circ}/\text{G}$ , respectively. C and Pt atoms are represented with red and white balls, respectively; the orientations of the Pt adlayer and graphene sheet are noted with black and blue, respectively, arrows and numbers. Induced charges are plotted with yellow/blue spheres for  $\pm 0.05 |e|$  of densely charged  $\text{G}_{0^\circ}$  and  $\pm 0.005 |e|$  of sparsely charged  $\text{G}_{30^\circ}$ .

**Figure S5**

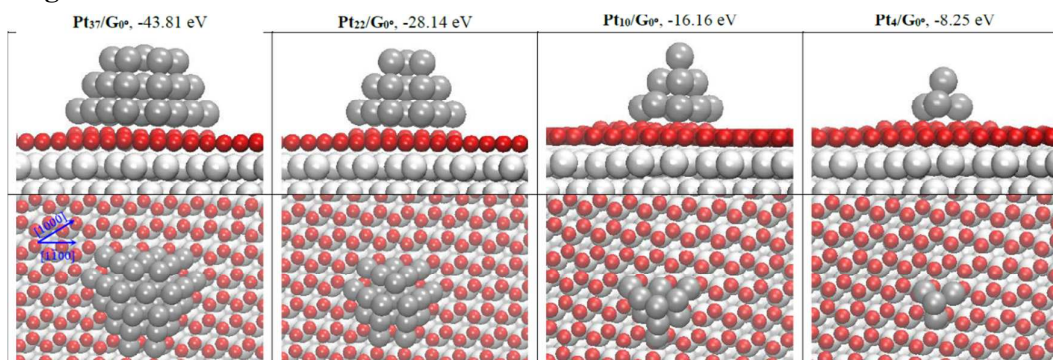

**Figure S5.** Top and side views of optimized structures and related  $E_{ads}$  of 3D Pt clusters, Pt<sub>37</sub>, Pt<sub>22</sub>, Pt<sub>10</sub> and Pt<sub>4</sub> (grey balls), on **G<sub>0</sub>** and **G<sub>30</sub>** substrates. The rotations of the beneath Pt(111) surface (white balls) are noted in black arrows and numbers; those of the graphene (red balls) are noted in the blue ones.
